# Supplementary material for: Clinical Value of Prognosis Gene Expression Signatures in Colorectal Cancer: A Systematic Review
Source: PLoS One. 2012 Nov 7;7(11):e48877. doi: 10.1371/journal.pone.0048877 (PMC3492249; doi:10.1371/journal.pone.0048877)
Supplement: File S6 — Global performance of signatures for all, stage II and stage III samples using Random Forest classifier. For each signature, sample size used in the analysis (separately for good and bad prognosis between brackets), pooled Matthews Correlation Coefficients (MCC) with 95% confidence intervals, accuracy rates, sensitivities and specificities are shown. For stage II and stage III analyses, also positive and negative likelihood ratios, negative and positive post-test probabilities, differences between post-test probabilities and 95% confidence interval are reported. Signatures are listed in decreasing order of MCC. Those with significant MCC at 5% level are highlighted in bold letters. (XLS) [file pone.0048877.s015.xls]

## Sheet: All samples
Signature	Sample size (Good + Bad prognosis)	MCC [95% CI ]	Accuracy (Sensitivity / Specificity)
BT04	1077 (681 + 396)	0.254 [0.193 , 0.309]	63% (65%, 61%)
KN11	1077 (681 + 396)	0.247 [0.187 , 0.303]	61% (65%, 60%)
VL10	889 (586 + 303)	0.212 [0.149 , 0.276]	60% (63%, 59%)
YM06	1077 (681 + 396)	0.192 [0.133 , 0.251]	59% (61%, 58%)
AJ08	1077 (681 + 396)	0.190 [0.130 , 0.244]	59% (63%, 57%)
ST09	977 (619 + 358)	0.178 [0.116 , 0.239]	58% (61%, 56%)
LN07NZ	928 (579 + 349)	0.176 [0.113 , 0.239]	59% (61%, 57%)
LC09	1077 (681 + 396)	0.171 [0.112 , 0.228]	58% (60%, 57%)
EC05	1077 (681 + 396)	0.167 [0.110 , 0.224]	58% (60%, 56%)
JS09	850 (565 + 285)	0.165 [0.099 , 0.231]	57% (62%, 55%)
LN07G	1077 (681 + 396)	0.156 [0.098 , 0.213]	58% (60%, 57%)
BR05	1077 (681 + 396)	0.148 [0.090 , 0.207]	58% (58%, 58%)
AD09MSI	1077 (681 + 396)	0.145 [0.088 , 0.203]	58% (58%, 58%)
SM09	1030 (654 + 376)	0.144 [0.083 , 0.205]	57% (59%, 55%)
HO09	1077 (681 + 396)	0.143 [0.085 , 0.200]	57% (59%, 56%)
KL10	1077 (681 + 396)	0.142 [0.085 , 0.202]	57% (59%, 56%)
BD07	1077 (681 + 396)	0.134 [0.071 , 0.190]	57% (57%, 57%)
AD09MSS	1077 (681 + 396)	0.120 [0.059 , 0.180]	57% (55%, 58%)
OC10	1077 (681 + 396)	0.120 [0.060 , 0.179]	56% (58%, 56%)
MT10	1077 (681 + 396)	0.110 [0.049 , 0.170]	56% (56%, 56%)
AR05	1077 (681 + 396)	0.109 [0.052 , 0.169]	55% (56%, 55%)
SC09	1077 (681 + 396)	0.096 [0.037 , 0.156]	54% (57%, 53%)
PL10	1077 (681 + 396)	0.096 [0.035 , 0.155]	56% (52%, 58%)
SL10	1077 (681 + 396)	0.091 [0.032 , 0.152]	54% (56%, 53%)
WT09	1077 (681 + 396)	0.089 [0.030 , 0.149]	53% (57%, 52%)
WG04	1077 (681 + 396)	0.084 [0.024 , 0.141]	54% (57%, 52%)
PG10	1077 (681 + 396)	0.073 [0.013 , 0.133]	54% (54%, 54%)
BR06	1077 (681 + 396)	0.059 [-0.000 , 0.119]	52% (54%, 52%)
WN10	1077 (681 + 396)	0.058 [0.001 , 0.118]	53% (53%, 53%)
JG08	1077 (681 + 396)	0.058 [-0.001 , 0.119]	53% (55%, 52%)
WT10	1077 (681 + 396)	0.028 [-0.032 , 0.088]	52% (51%, 52%)

## Sheet: Stage 2
Signature	Sample size (Good + Bad prognosis)	MCC [95% CI ]	Accuracy (Sensitivity / Specificity)	Positive Likelihood Ratio	Negative Likelihood Ratio	Positive Post-Test Probability	Negative Post-Test Probability	Difference Post-Test Probabilities [ 95% CI ]
YM06	322 (245 + 77)	0.209 [0.107 , 0.308]	58% (69%, 55%)	1.53	0.57	0.28	0.12	16% [8% , 23%]
BT04	322 (245 + 77)	0.202 [0.097 , 0.306]	59% (66%, 57%)	1.53	0.6	0.28	0.13	15% [7% , 22%]
EC05	322 (245 + 77)	0.199 [0.093 , 0.298]	58% (68%, 56%)	1.52	0.58	0.28	0.13	15% [7% , 22%]
KN11	322 (245 + 77)	0.187 [0.079 , 0.288]	57% (68%, 54%)	1.46	0.6	0.27	0.13	14% [6% , 21%]
VL10	284 (219 + 65)	0.181 [0.066 , 0.291]	58% (66%, 55%)	1.48	0.61	0.27	0.13	14% [5% , 22%]
LN07NZ	322 (245 + 77)	0.179 [0.074 , 0.282]	59% (64%, 58%)	1.5	0.63	0.27	0.14	14% [6% , 21%]
BR05	322 (245 + 77)	0.172 [0.064 , 0.279]	59% (62%, 58%)	1.48	0.65	0.27	0.14	13% [5% , 21%]
MT10	322 (245 + 77)	0.158 [0.051 , 0.263]	57% (65%, 54%)	1.42	0.65	0.26	0.14	12% [5% , 20%]
SM09	322 (245 + 77)	0.153 [0.049 , 0.256]	56% (66%, 52%)	1.39	0.65	0.26	0.14	12% [4% , 19%]
LC09	322 (245 + 77)	0.151 [0.047 , 0.251]	53% (69%, 49%)	1.34	0.64	0.25	0.14	11% [3% , 19%]
WT09	322 (245 + 77)	0.121 [0.016 , 0.227]	56% (60%, 54%)	1.31	0.74	0.25	0.16	9% [1% , 17%]
OC10	322 (245 + 77)	0.117 [0.012 , 0.227]	58% (55%, 59%)	1.34	0.77	0.25	0.16	9% [1% , 17%]
BD07	322 (245 + 77)	0.101 [-0.011 , 0.209]	54% (58%, 53%)	1.25	0.78	0.24	0.16	7% [-1% , 16%]
SL10	322 (245 + 77)	0.099 [-0.009 , 0.201]	53% (61%, 50%)	1.23	0.78	0.23	0.16	7% [-1% , 15%]
ST09	322 (245 + 77)	0.096 [-0.012 , 0.202]	50% (66%, 44%)	1.19	0.76	0.23	0.16	7% [-1% , 15%]
WN10	322 (245 + 77)	0.094 [-0.013 , 0.196]	53% (58%, 52%)	1.21	0.8	0.23	0.17	7% [-1% , 14%]
HO09	322 (245 + 77)	0.094 [-0.013 , 0.198]	54% (58%, 52%)	1.22	0.8	0.23	0.17	7% [-1% , 15%]
BR06	322 (245 + 77)	0.090 [-0.019 , 0.195]	52% (61%, 49%)	1.21	0.79	0.23	0.16	7% [-1% , 14%]
AD09MSS	322 (245 + 77)	0.081 [-0.026 , 0.189]	55% (55%, 55%)	1.2	0.83	0.23	0.17	6% [-2% , 14%]
LN07G	322 (245 + 77)	0.078 [-0.028 , 0.187]	54% (56%, 53%)	1.2	0.83	0.23	0.17	6% [-2% , 14%]
KL10	322 (245 + 77)	0.068 [-0.037 , 0.180]	53% (56%, 53%)	1.18	0.84	0.23	0.17	5% [-2% , 14%]
PL10	322 (245 + 77)	0.065 [-0.035 , 0.174]	55% (52%, 56%)	1.17	0.87	0.23	0.18	5% [-3% , 13%]
AJ08	322 (245 + 77)	0.061 [-0.046 , 0.169]	52% (56%, 51%)	1.13	0.87	0.22	0.18	4% [-4% , 12%]
AR05	322 (245 + 77)	0.059 [-0.049 , 0.168]	51% (58%, 49%)	1.14	0.86	0.22	0.18	5% [-4% , 12%]
WG04	322 (245 + 77)	0.044 [-0.057 , 0.149]	52% (55%, 51%)	1.12	0.88	0.22	0.18	4% [-4% , 12%]
JG08	322 (245 + 77)	0.019 [-0.084 , 0.134]	52% (52%, 51%)	1.07	0.93	0.21	0.19	2% [-5% , 11%]
AD09MSI	322 (245 + 77)	0.013 [-0.097 , 0.124]	50% (51%, 50%)	1.02	0.98	0.2	0.2	1% [-8% , 9%]
JS09	258 (195 + 63)	-0.001 [-0.120 , 0.128]	49% (52%, 48%)	1	1	0.2	0.2	0% [-9% , 10%]
SC09	322 (245 + 77)	-0.022 [-0.127 , 0.089]	49% (48%, 50%)	0.96	1.04	0.19	0.21	-1% [-9% , 7%]
PG10	322 (245 + 77)	-0.034 [-0.139 , 0.080]	47% (49%, 46%)	0.92	1.1	0.19	0.22	-3% [-11% , 5%]
WT10	322 (245 + 77)	-0.070 [-0.173 , 0.042]	47% (44%, 47%)	0.84	1.18	0.17	0.23	-5% [-13% , 3%]

## Sheet: Stage 3
Signature	Sample size (Good + Bad prognosis)	MCC [95% CI ]	Accuracy (Sensitivity / Specificity)	Positive Likelihood Ratio	Negative Likelihood Ratio	Positive Post-Test Probability	Negative Post-Test Probability	Difference Post-Test Probabilities [ 95% CI ]
AJ08	173 (92 + 81)	0.415 [0.277 , 0.545]	71% (69%, 72%)	2.45	0.43	0.56	0.18	38% [25% , 51%]
VL10	127 (67 + 60)	0.400 [0.234 , 0.554]	70% (68%, 72%)	2.41	0.44	0.55	0.19	37% [22% , 52%]
KN11	173 (92 + 81)	0.394 [0.255 , 0.519]	69% (70%, 67%)	2.16	0.44	0.53	0.18	34% [20% , 46%]
JS09	102 (55 + 47)	0.385 [0.210 , 0.563]	69% (70%, 67%)	2.15	0.44	0.52	0.19	34% [17% , 50%]
LC09	173 (92 + 81)	0.324 [0.183 , 0.466]	66% (69%, 63%)	1.87	0.49	0.49	0.2	29% [16% , 42%]
BT04	173 (92 + 81)	0.322 [0.173 , 0.456]	66% (65%, 66%)	1.94	0.52	0.5	0.21	29% [15% , 41%]
SM09	173 (92 + 81)	0.312 [0.172 , 0.451]	65% (68%, 63%)	1.84	0.51	0.49	0.21	28% [15% , 41%]
YM06	173 (92 + 81)	0.307 [0.167 , 0.444]	64% (67%, 62%)	1.75	0.54	0.47	0.22	26% [13% , 39%]
OC10	173 (92 + 81)	0.298 [0.151 , 0.437]	64% (64%, 64%)	1.79	0.56	0.48	0.22	26% [12% , 39%]
KL10	173 (92 + 81)	0.292 [0.157 , 0.431]	64% (68%, 60%)	1.69	0.54	0.47	0.22	25% [13% , 38%]
EC05	173 (92 + 81)	0.287 [0.144 , 0.421]	64% (65%, 63%)	1.77	0.55	0.48	0.22	26% [13% , 38%]
HO09	173 (92 + 81)	0.274 [0.133 , 0.414]	64% (64%, 63%)	1.74	0.57	0.47	0.23	25% [12% , 38%]
WG04	173 (92 + 81)	0.243 [0.111 , 0.374]	61% (68%, 54%)	1.49	0.59	0.43	0.23	20% [8% , 32%]
LN07G	173 (92 + 81)	0.222 [0.082 , 0.367]	60% (64%, 57%)	1.48	0.63	0.43	0.25	19% [6% , 32%]
JG08	173 (92 + 81)	0.213 [0.064 , 0.352]	60% (64%, 55%)	1.44	0.65	0.43	0.25	18% [4% , 30%]
LN07NZ	173 (92 + 81)	0.210 [0.060 , 0.354]	61% (60%, 61%)	1.55	0.65	0.44	0.25	19% [6% , 33%]
ST09	140 (70 + 70)	0.208 [0.050 , 0.378]	60% (63%, 57%)	1.47	0.65	0.43	0.25	18% [3% , 32%]
BR06	173 (92 + 81)	0.202 [0.051 , 0.342]	60% (57%, 62%)	1.49	0.7	0.43	0.26	17% [3% , 31%]
WN10	173 (92 + 81)	0.169 [0.015 , 0.310]	57% (58%, 55%)	1.3	0.76	0.4	0.28	12% [-2% , 25%]
MT10	173 (92 + 81)	0.149 [0.004 , 0.299]	58% (54%, 61%)	1.39	0.75	0.42	0.28	14% [1% , 28%]
WT10	173 (92 + 81)	0.146 [0.001 , 0.286]	56% (62%, 51%)	1.26	0.75	0.39	0.28	12% [-2% , 24%]
SC09	173 (92 + 81)	0.128 [-0.021 , 0.277]	56% (58%, 54%)	1.27	0.77	0.4	0.28	11% [-3% , 24%]
PG10	173 (92 + 81)	0.109 [-0.030 , 0.253]	55% (53%, 57%)	1.22	0.83	0.39	0.3	9% [-4% , 22%]
BR05	173 (92 + 81)	0.087 [-0.057 , 0.240]	54% (59%, 49%)	1.16	0.83	0.37	0.3	7% [-6% , 21%]
AR05	173 (92 + 81)	0.064 [-0.084 , 0.211]	52% (56%, 49%)	1.09	0.91	0.36	0.32	4% [-10% , 17%]
SL10	173 (92 + 81)	0.061 [-0.087 , 0.218]	53% (53%, 53%)	1.14	0.88	0.37	0.31	6% [-8% , 20%]
PL10	173 (92 + 81)	0.058 [-0.090 , 0.209]	54% (49%, 58%)	1.16	0.88	0.38	0.31	6% [-7% , 20%]
AD09MSI	173 (92 + 81)	0.039 [-0.115 , 0.193]	51% (49%, 53%)	1.06	0.95	0.35	0.33	2% [-11% , 16%]
WT09	173 (92 + 81)	0.017 [-0.131 , 0.167]	50% (53%, 48%)	1.02	0.98	0.34	0.34	1% [-13% , 14%]
AD09MSS	173 (92 + 81)	0.016 [-0.133 , 0.174]	51% (49%, 53%)	1.06	0.95	0.35	0.33	2% [-11% , 16%]
BD07	173 (92 + 81)	0.014 [-0.120 , 0.164]	51% (53%, 49%)	1.04	0.96	0.35	0.33	2% [-11% , 15%]
