# Supplementary material for: Clinical Value of Prognosis Gene Expression Signatures in Colorectal Cancer: A Systematic Review
Source: PubMed Central journal article supplement (PMC3492249; doi:10.1371/journal.pone.0048877), 2012-11-07

# Disease free survival for signature AJ08 in dataset GSE14333

## Stage III samples

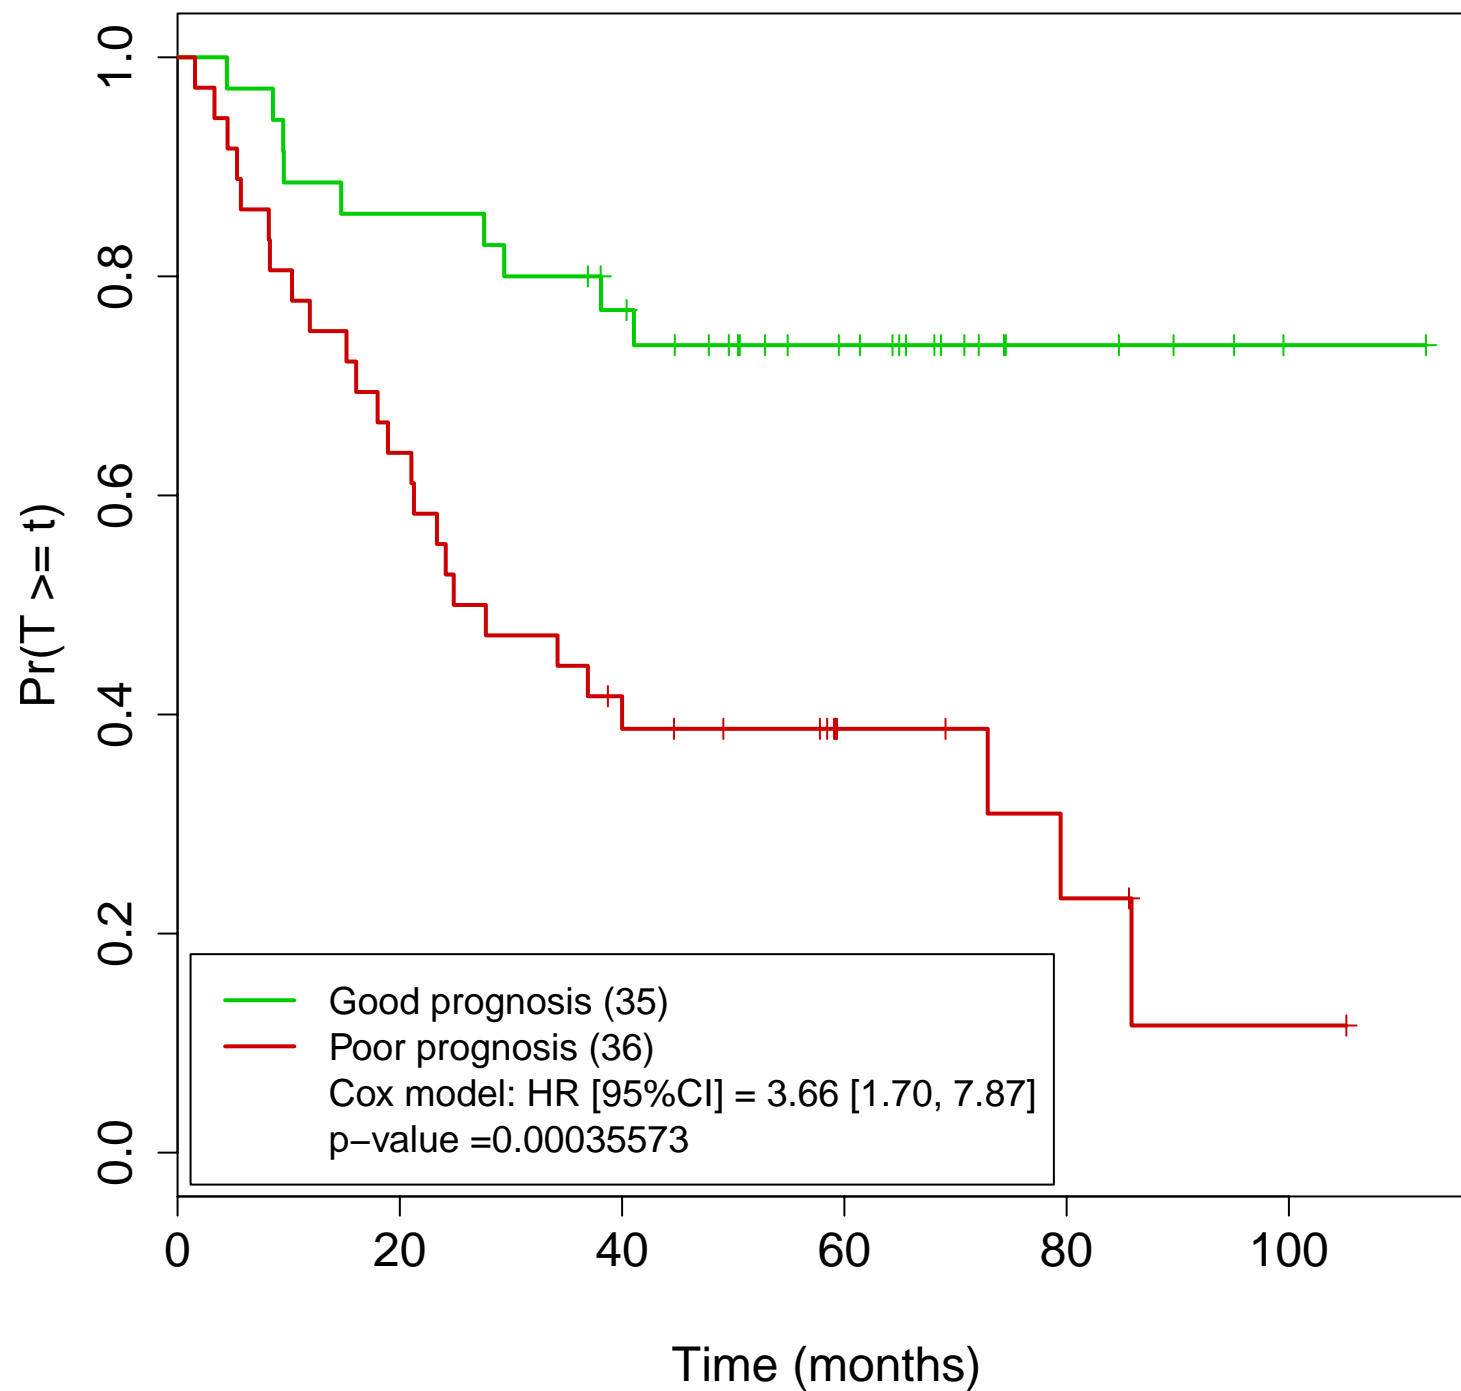

Supplement: pone.0048877.s008.pdf [file pone.0048877.s008.pdf]
